# Supplementary material for: Conclusive Evidence for Cattle Traction in Middle Neolithic Ireland: A Pivotal Element for Resource Exploitation
Source: Research Square preprint supplement (doi:10.21203/rs.3.rs-1442762/v1), 2022-04-01
Supplement: Supplementary file 1 [file 9d3309e45be89d3a5be87005.xlsx]

## Sheet: Supplementary material Table S3
Context	Sample	Bone	Bd	e	D1	e/D1
5538	522	Mc	61.8	19.4	26.2	0.75
5014	1574	Mc	64.0	18.8	26.0	0.72
5418B	1217	Mc	63.1	18.5	25.6	0.72
5418B	1213	Mc	69.0	21.0	28.1	0.75
5014	1566	Mc	68.7	20.6	28.9	0.71
5418B	1112	Mc	63.0	19.4	25.9	0.75
5418	1119	Mc	64.2	17.6	26.3	0.67
5164	239	Mt	59.9	18.1	24.8	0.73
5325	705	Mt	55.2	16.4	23.6	0.69
5418B	1124	Mt	61.3	20.4	26.2	0.78
5418B	1214	Mt	62.1	19.8	26.5	0.75
5418B	505	Mt	60.3	17.9	26.1	0.69
5418	1119	Mt	64.6	23.2	27.0	0.86
5503	467	Mt	57.9	16.8	23.8	0.71
5418B	504	Mt	56.9	17.5	23.7	0.74
Supplementary material Table S3. Measures on metatarsals and traction index calculated following Lin et al (2016): e/D1
