# Supplementary material for: Conclusive Evidence for Cattle Traction in Middle Neolithic Ireland: A Pivotal Element for Resource Exploitation
Source: Research Square preprint supplement (doi:10.21203/rs.3.rs-1442762/v1), 2022-04-01
Supplement: Supplementary file 2 [file e9bd8f3fcecf19cf85785264.xlsx]

## Sheet: Supplementary material Table S4
Context	Sample No	Element	SIDE	P4	M1	M2	M3
5418	1000	Mandible	L	d	k	j	g
5418	1001	Mandible	R	c	k	g	c
5418	1001	Mandible	L	b	k	g	c
5164	1043	Mandible	L	b	k	g	b
5418	1059	Mandible	R	0	k	0	c
5418	1092	Mandible	L	c	k	g	e
5418	1093	Mandible	R	E	k	j	g
5418	1095	Mandible	L	c	k	j	g
5418	1095	Mandible	R	c	M	k	g
5014	1096	Mandible	L	A	k	0	c
5014	1096	Mandible	R	a	k	g	c
5418	1097	Mandible	R	c	k	0	b
5418	1097	Mandible	L	b	k	g	b
5418	1123	Mandible	L	0	j	k	g
5014	1138	Mandible	R	0	g	b	0
5014	1139	Mandible	L	0	g	b	a
5014	1202	Mandible	L	b	j	g	c
5418	1221	Mandible	L	e	j	g	b
5014	1227	Mandible	L	c	k	0	f
5014	1227	Mandible	R	c	0	0	f
5014	1232	Mandible	R	0	h	g	0
5014	1232	Mandible	R	0	0	0	d
Table S4. Eruption and attrition stages of cattle teeth following Grant (1982).
Context	Sample No	Element	SIDE	P4	M1	M2	M3
5418	1296	Mandible	R	c	k	j	f
5538	1382	Mandible	R	b	k	g	c
5538	1385	Mandible	R	b	j	g	c
5538	1387	Mandible	L	A	j	g	b
5014	1388	Mandible	R	c	k	h	b
5325	1392	Mandible	L	A	k	g	b
5014	1393	Mandible	L	b	j	g	b
5014	1402	Mandible	L	A	g	f	a
5325	1408	Mandible	R	A	k	g	b
5161	141	Mandible	L	A	k	g	b
5765	1413	Mandible	L	0	k	0	b
5765	1413	Mandible	L	0	k	c	b
5380	1418	Mandible	R	0	k	g	a
5380	1419	Mandible	L	0	0	g	g
5380	1419	Mandible	R	0	k	g	a
5161	142	Mandible	R	0	k	g	c
5161	143	Mandible	U	A	k	h	b
5380	1462	Mandible	L	0	k	g	a
5380	1478	Mandible	R	0	k	g	c
5380	1478	Mandible	L	0	k	g	b
5380	1488	Mandible	L	0	g	g	a
5014	1562	Mandible	R	g	l	0	k
Table S4. Eruption and attrition stages of cattle teeth following Grant (1982).
Context	Sample No	Element	SIDE	P4	M1	M2	M3
5014	1562	Mandible	R	g	m	k	k
5014	1565	Mandible	U	A	j	f	a
5014	1569	Mandible	L	c	k	0	c
5014	1570	Mandible	R	b	k	0	c
5014	1575	Mandible	L	f	l	g	g
5014	1576	Mandible	L	c	k	g	c
5418	1662	Mandible	L	0	0	g	c
5164	190	Mandible	R	A	k	f	b
5164	190	Mandible	L	a	k	f	b
5164	252	Mandible	R	c	k	0	c
5164	252	Mandible	R	a	k	0	b
5166	305	Mandible	L	c	k	h	e
5166	314	Mandible	R	d	k	g	e
5014	345	Mandible	R	0	0	0	b
5014	345	Mandible	L	0	0	0	b
5014	382	Mandible	R	0	0	f	b
5014	382	Mandible	L	0	k	f	b
5014	383	Mandible	L	a	k	f	b
5014	39	Mandible	R	a	k	g	b
5503	461	Mandible	L	c	j	h	g
5503	471	Mandible	R	b	k	f	b
5538	486	Mandible	R	0	g	A	0
Table S4. Eruption and attrition stages of cattle teeth following Grant (1982).
Context	Sample No	Element	SIDE	P4	M1	M2	M3
5538	486	Mandible	L	0	g	A	0
5418	494	Mandible	R	f	k	k	g
5418	494	Mandible	L	f	k	k	g
5418	525	Mandible	R	0	k	h	c
5418	526	Mandible	L	0	0	0	c
5538	529	Mandible	R	b	l	g	e
5538	529	Mandible	L	A	l	g	e
5538	534	Mandible	L	c	k	g	f
5380	567	Mandible	L	b	k	0	c
5166	573	Mandible	R	A	k	0	c
5166	574	Mandible	L	a	k	j	c
5325	632	Mandible	L	0	m	l	k
5325	632	Mandible	R	0	m	l	k
5325	635	Mandible	L	A	j	g	a
5014	654	Mandible	L	0	k	0	c
5325	710	Mandible	R	c	k	g	f
5325	712	Mandible	L	c	k	g	f
5325	715	Mandible	L	A	k	g	b
5325	715	Mandible	R	A	k	g	b
5325	717	Mandible	R	A	k	g	e
5325	718	Mandible	L	A	k	g	e
5325	720	Mandible	R	c	k	h	c
Table S4. Eruption and attrition stages of cattle teeth following Grant (1982).
Context	Sample No	Element	SIDE	P4	M1	M2	M3
5325	722	Mandible	R	0	j	g	b
5325	722	Mandible	L	A	j	g	b
5325	726	Mandible	L	c	k	h	d
5325	787	Mandible	R	0	0	0	b
5325	787	Mandible	R	0	0	0	b
5418	842	Mandible	R	0	k	k	k
5418	842	Mandible	L	g	k	k	k
5014	853	Mandible	R	0	0	0	b
5014	862	Mandible	L	A	k	g	b
5014	862	Mandible	R	A	k	g	b
5418	885	Mandible	R	b	j	g	c
5418	971	Mandible	R	f	k	j	g
Table S4. Eruption and attrition stages of cattle teeth following Grant (1982).
